# Supplementary material
Source: publisher figshare collection journal article supplement (https://aacr.figshare.com/articles/dataset/_/22402409)

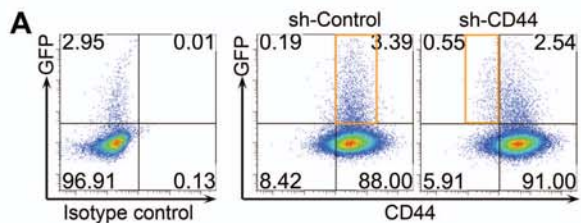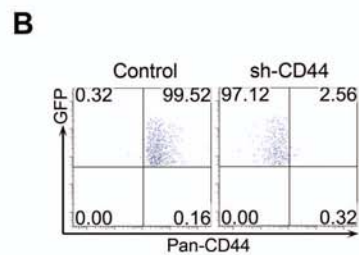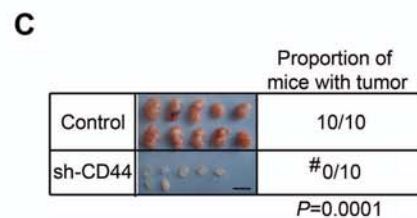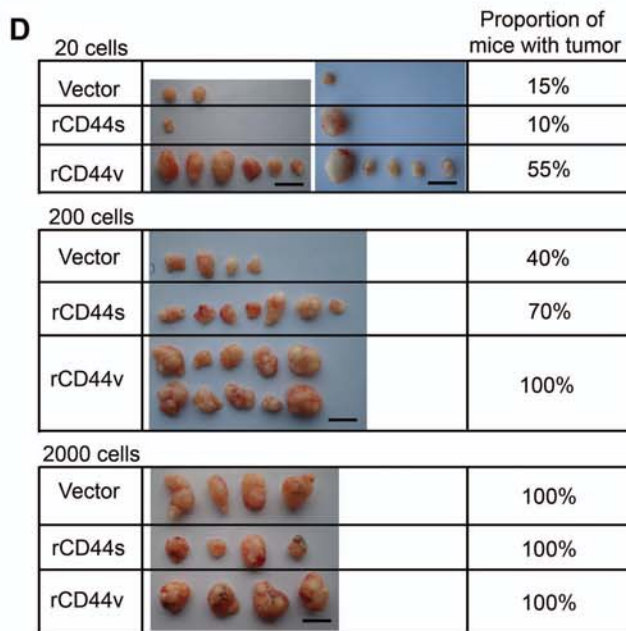

Supplement: Supplementary file 1 [file 39848204]
